# Supplementary material
Source: Research Square preprint supplement (doi:10.21203/rs.3.rs-8476586/v1)
Supplement: Supplementary file 1 [file eb1fe1424f246ad3477af11a.docx]

**Supplementary information**

**Supplement 1: Supplementary Methods**

Student Curriculum Investment Instrument (SCII)

**Supplement 2: Respondent Distribution**

**Supplementary Table 1.** Survey respondent distribution

**Supplementary Figure 1.** Scatter diagram of STEM problem-solving process

**Supplement** **3: Measurements Quantitative Results**

**Supplementary Figure 2:** Path map of three evidences model and standardized estimations of teacher effectiveness (N=126).

**Supplementary Table 2:** Loading factor value of teacher effectiveness (N=63).

**Supplementary Table 3.** Mean effectiveness of teacher effectiveness

**Supplementary Figure 3:** Scatter diagram of teacher effectiveness about Electromagnet-ism group and Mechanics group

**Supplementary Figure 4:** Path map of three evidences model and standardized estimations of curriculum attractiveness (N=126).

**Supplementary Table 4:** Loading factor value of curriculum attractiveness (N=63).

**Supplementary Table 5.** Mean effectiveness of curriculum attractiveness

**Supplementary Figure 5:** Scatter diagram of curriculum attractiveness about Electromagnetism group and Mechanics group

**Supplementary Figure 6:** Path map of three evidences model and standardized estimations of student enthusiasm (N=126).

**Supplementary Table 6:** Loading factor value of student enthusiasm (N=63).

**Supplementary Table 7.** Mean effectiveness of student enthusiasm

**Supplementary Figure 7:** Scatter diagram of student enthusiasm about Electromagnet-ism group and Mechanics group

**Supplement 4: Results of RIEBP comprehension analysis**

**Supplementary Table 7.** Results of RIEBP comprehension analysis in STEM field.

**Supplement 5: Results of RIEBP experimental report scores**

**Supplementary Figure 8.**  Distribution of experimental and control group experimental report scores

**Supplementary Table 8.** The comparison of experimental and control group's academic achievement pre-tests and post-tests

**Data**

Data-1.xlsx, Data-2.xlsx, Data-3.xlsx

**Supplement 1: Supplementary Methods**

1. 1. Student Classroom Investment Instrument (SCII)

Survey: Mean effectiveness of RIEBP, grouped by initiative type/survey question (Teacher-acceptability; Curriculums-attractiveness; Student-enthusiasm).

*Description and definitions*

This survey evaluates the cultivation of high-quality classroom engagement with the subject matter. We define the following terms relevant to classroom engagement in the RIEBP model as:

- **Classroom engagement:** Behavioral Engagement (BE), Cognitive Engagement (CE), Emotional Engagement (EE).
- **BE:** Behavioral engagement includes five observable indicators  (for )

1. Reviewing class-room content in a timely manner, (2) Maintaining consistent daily learning habitus rather than cramming before exams, (3) Previewing upcoming lesson content, (4) Planning weekly academic tasks in advance, and (5) Dedicating fixed times each week to complete homework.

- **CE:** Cognitive engagement is indicated by four behaviors (for )

(6) Formulating original ideas during learning, (7) Discerning teacher’s instructional intentions, (8) Pausing during reading to reflect on the material, and (9) Critically questioning or challenging learned content.

- **EE:** Emotional engagement is represented by three indicators (for )

(10) Experiencing satisfaction from learning, (11) Expressing curiosity about lesson content, and (12) Putting forth effort driven by intrinsic interest.

*Main survey*

1. Behavioral investment of SMF

Experimental ID:

(1) Reviewing class-room content in a timely manner?

(2) Maintaining consistent daily learning habitus rather than cramming before exams?

(3) Previewing upcoming lesson content?

(4) Planning weekly academic tasks in advance?

(5) Dedicating fixed times each week to complete homework?

1. Cognitive investment of SMF

Experimental ID:

(6) Formulating original ideas during learning?

(7) Discerning teacher’s instructional intentions?

(8) Pausing during reading to reflect on the material?

(9) Critically questioning or challenging learned content?

1. Emotional investment of SMF

Experimental ID:

(10) Experiencing satisfaction from learning？

(11) Expressing curiosity about lesson content？

(12) Putting forth effort driven by intrinsic interest？

1. Which initiatives do you think are, or could be, effective at improving any aspect of **RIEBP** i**n your classroom** (excluding behavioral, cognitive, and emotional engagement in this survey)?
   *Response type: 5-factor Likert scale (Not effective; slightly effective; moderately effective; very effective; extremely effective; NA/I don’t know)*

| **Initiative as displayed in survey** | **Abbreviation used in text** |
| --- | --- |
| Behavioral engagement | BE |
| Cognitive engagement | CE |
| Emotional engagement | EE |
| Observable indicators | (for ) |
| twelve confirmatory components | (for ) |
| Teacher effectiveness | EF |
| Curriculum attractiveness | AT |
| Students’ enthusiasm | EN |
| Electromagnetism group | EG |
| Mechanics group | MG |
| Achievement level of teacher | ALT |
| Achievement level of curriculum | ALC |
| Achievement level of student | ALS |
| A five-point Likert scale for RIEBP (RIEBP-FLS) (i.e. behavioral, cognitive, and emotional engagement) | (for) |
| experimental report scores | ERS |
| Other (please describe) |  |

**Supplement 2:** **Survey respondent distribution**

**Supplementary Table 1:** Distribution of advanced levels of problem-solving

|  | Micro-fairness evaluation | | Standardized estimations of teacher effectiveness | | Standardized estimations of curriculum attractiveness. | | Standardized estimation of student enthusiasm | | Experimental report scores | |
| --- | --- | --- | --- | --- | --- | --- | --- | --- | --- | --- |
| Experim-ental Class | Control class | Experim-ental Class | Control class | Experim-ental Class | Control class | Experim-ental class | Control class | Experim-ental class | Control class |
| **Understanding problems** | 10 | 12 | 17 | 20 | 16 | 14 | 12 | 10 | 10 | 10 |
| **Problems representation** | 12 | 15 | 17 | 18 | 18 | 21 | 14 | 14 | 10 | 10 |
| **Seeking solutions** | 12 | 14 | 16 | 18 | 18 | 17 | 15 | 17 | 12 | 10 |
| **Solving problems** | 12 | 14 | 15 | 17 | 19 | 16 | 16 | 16 | 11 | 10 |
| **Evaluation Reflection** | 10 | 11 | 14 | 19 | 17 | 19 | 19 | 16 | 11 | 10 |
| **Average** | 11 | 13 | 16 | 18 | 18 | 17 | 15 | 15 | 11 | 10 |

**Supplementary Figure 1:** Scatter diagram of STEM problem-solving process


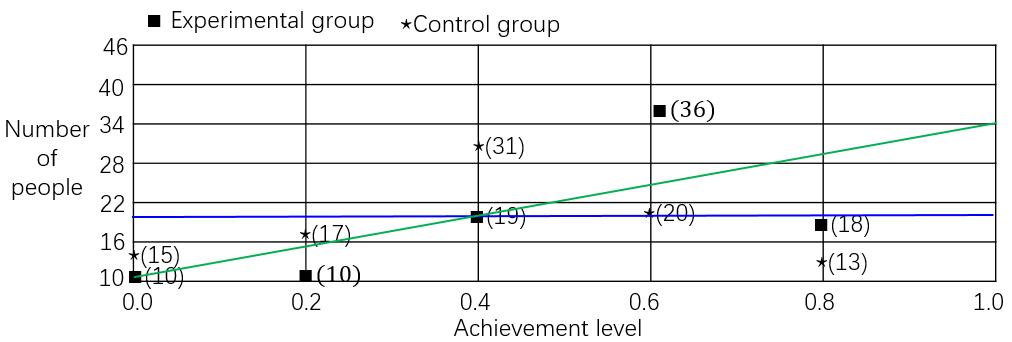


**Supplement 3: Measurements Quantitative Results**

**Supplementary Figure 2:** Path map of three evidences model and standardized estimations of teacher effectiveness (N=126).

**Supplementary Table 2:** Loading factor value of teacher effectiveness (N=126).

| No | Variable | observed variables | Loading factor | Error | Verification |
| --- | --- | --- | --- | --- | --- |
| 1 | BE | ↔ CE | 0.62 | 0.12 | Valid |
| 2 | BE | ↔ EE | 0.66 | 0.20 | Valid |
| 3 | CE | ↔ EE | 0.58 | 0.07 | Valid |
| 4 | BE | → P1 | 0.88 | 0.11 | Valid |
| 5 | BE | → P2 | 0.86 | 0.12 | Valid |
| 6 | BE | → P3 | 0.78 | 0.07 | Valid |
| 7 | BE | → P4 | 0.76 | 0.21 | Valid |
| 8 | BE | → P5 | 0.66 | 0.08 | Valid |
| 9 | CE | → P6 | 0.84 | 0.16 | Valid |
| 10 | CE | → P7 | 0.76 | 0.06 | Valid |
| 11 | CE | → P8 | 0.72 | 0.17 | Valid |
| 12 | CE | → P9 | 0.73 | 0.13 | Valid |
| 13 | EE | → P10 | 0.68 | 0.08 | Valid |
| 14 | EE | → P11 | 0. 86 | 0.10 | Valid |
| 15 | EE | → P12 | 0. 82 | 0.15 | Valid |
| 16 | P1 | → E1 | 0. 79 | 0.16 | Valid |
| 17 | P2 | → E2 | 0. 76 | 0.10 | Valid |
| 18 | P3 | → E3 | 0. 66 | 0.09 | Valid |
| 19 | P4 | → E4 | 0. 59 | 0.06 | Valid |
| 20 | P5 | → E5 | 0. 49 | 0.04 | Valid |
| 21 | P6 | → E6 | 0. 69 | 0.05 | Valid |
| 22 | P7 | → E7 | 0. 59 | 0.07 | Valid |
| 23 | P8 | → E8 | 0. 58 | 0.11 | Valid |
| 24 | P9 | → E9 | 0. 77 | 0.14 | Valid |
| 25 | P10 | → E10 | 0. 48 | 0.04 | Valid |
| 26 | P11 | → E11 | 0. 89 | 0.17 | Valid |
| 27 | P12 | → E12 | 0. 86 | 0.16 | Valid |
| 28 | E1 | → EF | 0. 67 | 0.06 | Valid |
| 29 | E2 | → EF | 0. 62 | 0.05 | Valid |
| 30 | E3 | → EF | 0. 87 | 0.08 | Valid |
| 31 | E4 | → EF | 0. 56 | 0.05 | Valid |
| 32 | E5 | → EF | 0. 47 | 0.04 | Valid |
| 33 | E6 | → EF | 0. 76 | 0.10 | Valid |
| 34 | E7 | → EF | 0. 67 | 0.09 | Valid |
| 35 | E8 | → EF | 0. 55 | 0.06 | Valid |
| 36 | E9 | → EF | 0. 44 | 0.07 | Valid |
| 37 | E10 | → EF | 0. 87 | 0.11 | Valid |
| 38 | E11 | → EF | 0. 81 | 0.08 | Valid |
| 39 | E12 | → EF | 0. 65 | 0.06 | Valid |

**Supplementary Table 3.** Mean effectiveness of teacher effectiveness

|  |  |  |  |  |  |  |  |  |  |  |  |  |
| --- | --- | --- | --- | --- | --- | --- | --- | --- | --- | --- | --- | --- |
| EG | 0.67 | 0.62 | 0.87 | 0.56 | 0.47 | 0.76 | 0.67 | 0.55 | 0.44 | 0.87 | 0.81 | 0.65 |
| ALT | 0.60 | 0.50 | 0.80 | 0.80 | 0.50 | 0.90 | 0.80 | 0.70 | 0.60 | 0.90 | 0.90 | 0.70 |
| MG | 0.25 | 0.31 | 0.45 | 0.60 | 0.40 | 0.41 | 0.57 | 0.42 | 0.45 | 0.67 | 0.55 | 0.60 |
| ALT | 0.20 | 0.30 | 0.40 | 0.40 | 0.50 | 0.60 | 0.60 | 0.70 | 0.80 | 0.80 | 0.90 | 0.90 |

**Supplementary Figure 3:** Scatter diagram of teacher effectiveness about Electromagnetism group and Mechanics group


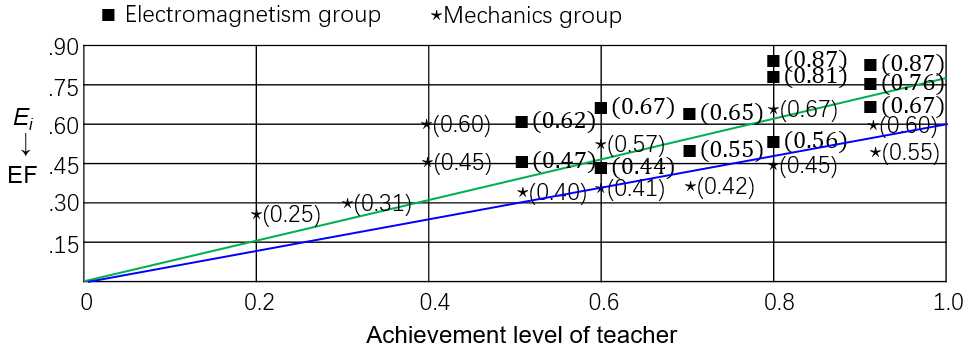


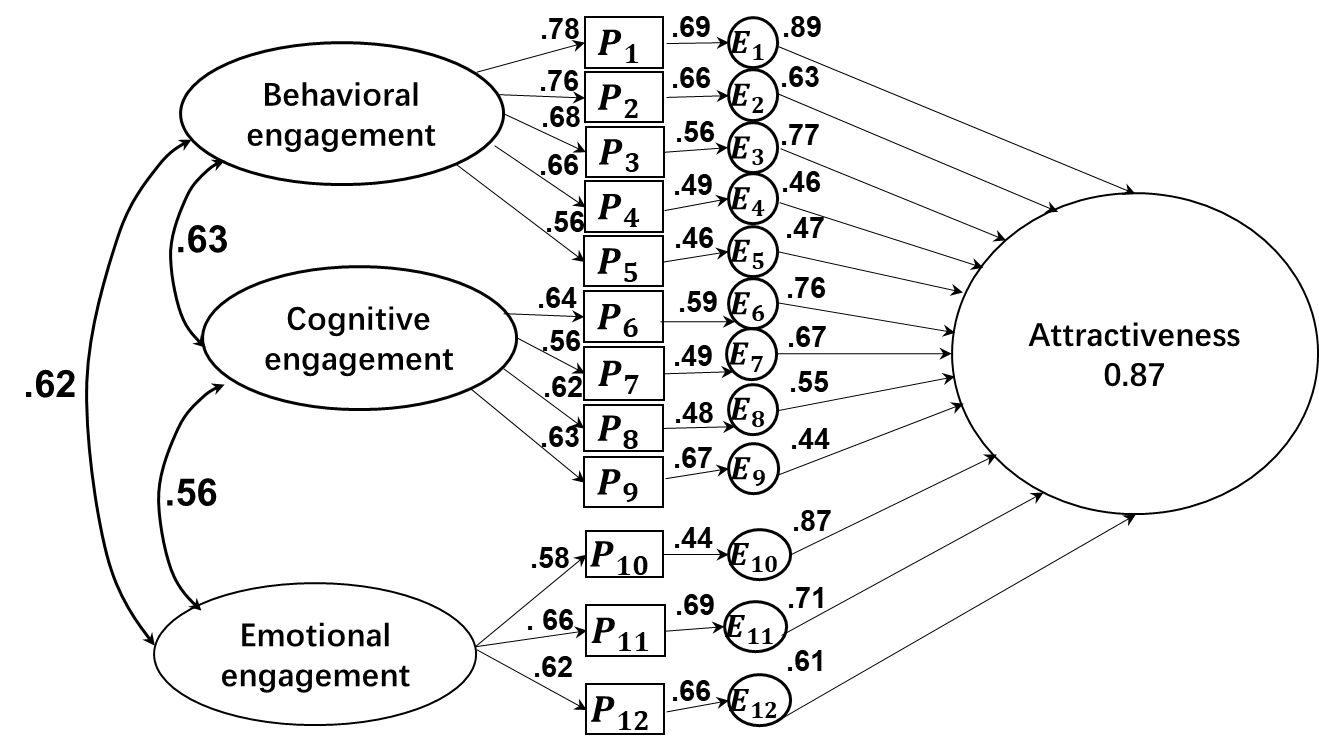


**Supplementary Figure 4:** Path map of three evidences model and standardized estimations of curriculum attractiveness (N=126).

**Supplementary Table4:** Loading factor value of curriculum attractiveness (N=126).

| No | Variable | observed variables | Loading factor | Error | Verification |
| --- | --- | --- | --- | --- | --- |
| 1 | BE | ↔ CE | 0.63 | 0.13 | Valid |
| 2 | BE | ↔ EE | 0.56 | 0.18 | Valid |
| 3 | CE | ↔ EE | 0.62 | 0.17 | Valid |
| 4 | BE | → P1 | 0.78 | 0.10 | Valid |
| 5 | BE | → P2 | 0.76 | 0.09 | Valid |
| 6 | BE | → P3 | 0.68 | 0.06 | Valid |
| 7 | BE | → P4 | 0.66 | 0.30 | Valid |
| 8 | BE | → P5 | 0.56 | 0.18 | Valid |
| 9 | CE | → P6 | 0.64 | 0.13 | Valid |
| 10 | CE | → P7 | 0.56 | 0.05 | Valid |
| 11 | CE | → P8 | 0.62 | 0.11 | Valid |
| 12 | CE | → P9 | 0.63 | 0.10 | Valid |
| 13 | EE | → P10 | 0.58 | 0.07 | Valid |
| 14 | EE | → P11 | 0.66 | 0.09 | Valid |
| 15 | EE | → P12 | 0. 62 | 0.05 | Valid |
| 16 | P1 | → E1 | 0. 69 | 0.15 | Valid |
| 17 | P2 | → E2 | 0. 66 | 0.09 | Valid |
| 18 | P3 | → E3 | 0. 56 | 0.07 | Valid |
| 19 | P4 | → E4 | 0. 49 | 0.05 | Valid |
| 20 | P5 | → E5 | 0. 46 | 0.06 | Valid |
| 21 | P6 | → E6 | 0. 59 | 0.07 | Valid |
| 22 | P7 | → E7 | 0. 49 | 0.04 | Valid |
| 23 | P8 | → E8 | 0. 48 | 0.09 | Valid |
| 24 | P9 | → E9 | 0. 67 | 0.08 | Valid |
| 25 | P10 | → E10 | 0. 44 | 0.06 | Valid |
| 26 | P11 | → E11 | 0. 69 | 0.10 | Valid |
| 27 | P12 | → E12 | 0. 66 | 0.04 | Valid |
| 28 | E1 | → AT | 0.89 | 0.26 | Valid |
| 29 | E2 | → AT | 0.63 | 0.12 | Valid |
| 30 | E3 | → AT | 0.77 | 0.17 | Valid |
| 31 | E4 | → AT | 0. 46 | 0.05 | Valid |
| 32 | E5 | → AT | 0. 47 | 0.04 | Valid |
| 33 | E6 | → AT | 0. 76 | 0.10 | Valid |
| 34 | E7 | → AT | 0. 67 | 0.09 | Valid |
| 35 | E8 | → AT | 0. 55 | 0.06 | Valid |
| 36 | E9 | → AT | 0. 44 | 0.07 | Valid |
| 37 | E10 | → AT | 0. 87 | 0.21 | Valid |
| 38 | E11 | → AT | 0.71 | 0.18 | Valid |
| 39 | E12 | → AT | 0. 61 | 0.16 | Valid |

**Supplementary Table 5.** Mean effectiveness of curriculum attractiveness

|  |  |  |  |  |  |  |  |  |  |  |  |  |
| --- | --- | --- | --- | --- | --- | --- | --- | --- | --- | --- | --- | --- |
| EG | 0.89 | 0.63 | 0.77 | 0.46 | 0.47 | 0.76 | 0.67 | 0.55 | 0.44 | 0.87 | 0.71 | 0.61 |
| ALC | 0.60 | 0.50 | 0.80 | 0.80 | 0.50 | 0.90 | 0.80 | 0.70 | 0.60 | 0.90 | 0.90 | 0.70 |
| MG | 0.27 | 0.21 | 0.50 | 0.30 | 0.41 | 0.39 | 0.59 | 0.42 | 0.45 | 0.67 | 0.56 | 0.65 |
| ALC | 0.20 | 0.30 | 0.40 | 0.40 | 0.50 | 0.60 | 0.60 | 0.70 | 0.80 | 0.80 | 0.90 | 0.90 |

**Supplementary Figure 5:** Scatter diagram of curriculum attractiveness about Electromagnet-ism group and Mechanics group


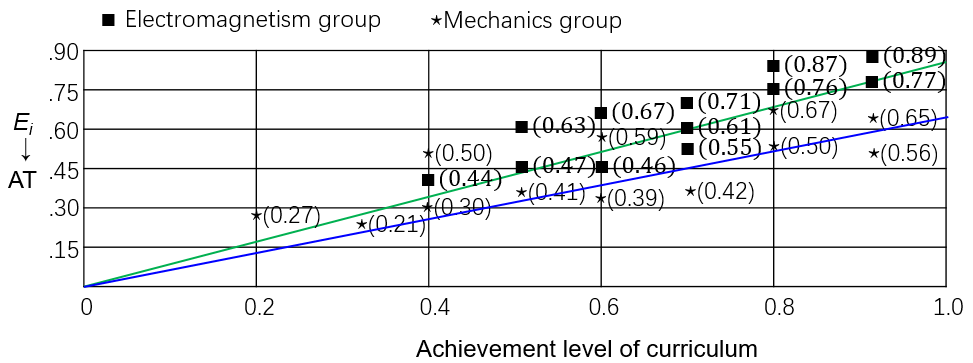


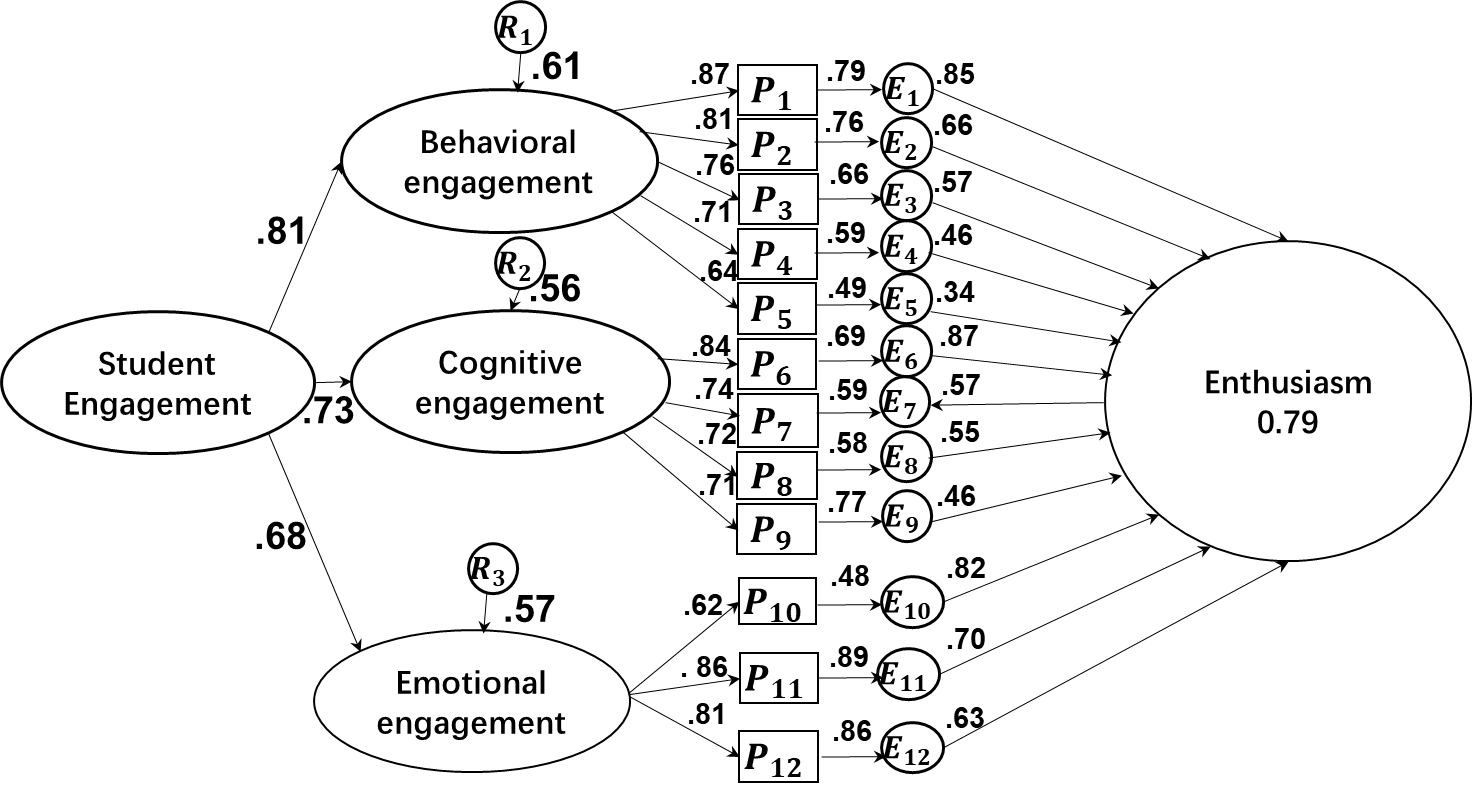


**Supplementary Figure 6:** Path map of three evidences model and standardized estimations of curriculum attractiveness (N=126).

**Supplementary** **Table 6:** Loading factor value ofstudent enthusiasm(N=126).

| **No** | **Variable** | **Observed variables** | **Loading factor** | **Error** | **Verification** |
| --- | --- | --- | --- | --- | --- |
| 1 | SE | → BE | 0.81 | 0.19 | Valid |
| 2 | SE | → CE | 0.73 | 0.16 | Valid |
| 3 | SE | → EE | 0.68 | 0.12 | Valid |
| 4 | R1 | → BE | 0.61 | 0.10 | Valid |
| 5 | R2 | → CE | 0.56 | 0.11 | Valid |
| 6 | R3 | → EE | 0.57 | 0.09 | Valid |
| 7 | BE | → P1 | 0.87 | 0.08 | Valid |
| 8 | BE | → P2 | 0.81 | 0.15 | Valid |
| 9 | BE | → P3 | 0.76 | 0.07 | Valid |
| 10 | BE | → P4 | 0.71 | 0.23 | Valid |
| 11 | BE | → P5 | 0.64 | 0.21 | Valid |
| 12 | CE | → P6 | 0.84 | 0.33 | Valid |
| 13 | CE | → P7 | 0.74 | 0.25 | Valid |
| 14 | CE | → P8 | 0.72 | 0.21 | Valid |
| 15 | CE | → P9 | 0.71 | 0.19 | Valid |
| 16 | EE | → P10 | 0.62 | 0.17 | Valid |
| 17 | EE | → P11 | 0.86 | 0.19 | Valid |
| 18 | EE | → P12 | 0.81 | 0.15 | Valid |
| 19 | P1 | → E1 | 0.79 | 0.14 | Valid |
| 20 | P2 | → E2 | 0.76 | 0.19 | Valid |
| 21 | P3 | → E3 | 0.66 | 0.17 | Valid |
| 22 | P4 | → E4 | 0.59 | 0.15 | Valid |
| 23 | P5 | → E5 | 0.49 | 0.16 | Valid |
| 24 | P6 | → E6 | 0. 69 | 0.07 | Valid |
| 25 | P7 | → E7 | 0. 59 | 0.14 | Valid |
| 26 | P8 | → E8 | 0. 58 | 0.19 | Valid |
| 27 | P9 | → E9 | 0. 77 | 0.18 | Valid |
| 28 | P10 | → E10 | 0. 48 | 0.16 | Valid |
| 29 | P11 | → E11 | 0. 89 | 0.12 | Valid |
| 30 | P12 | → E12 | 0. 86 | 0.14 | Valid |
| 31 | E1 | → EN | 0. 85 | 0.15 | Valid |
| 32 | E2 | → EN | 0. 66 | 0.13 | Valid |
| 33 | E3 | → EN | 0. 57 | 0.14 | Valid |
| 34 | E4 | → EN | 0. 46 | 0.15 | Valid |
| 35 | E5 | → EN | 0. 34 | 0.09 | Valid |
| 36 | E6 | → EN | 0. 87 | 0.19 | Valid |
| 37 | E7 | → EN | 0. 57 | 0.13 | Valid |
| 38 | E8 | → EN | 0. 55 | 0.11 | Valid |
| 39 | E9 | → EN | 0. 46 | 0.10 | Valid |
| 40 | E10 | → EN | 0. 82 | 0.18 | Valid |
| 41 | E11 | → EN | 0. 70 | 0.16 | Valid |
| 42 | E12 | → EN | 0. 63 | 0.13 | Valid |

**Supplementary Table 6.** Mean effectiveness of student enthusiasm

|  |  |  |  |  |  |  |  |  |  |  |  |  |
| --- | --- | --- | --- | --- | --- | --- | --- | --- | --- | --- | --- | --- |
| EG | 0.85 | 0.66 | 0.57 | 0.46 | 0.34 | 0.87 | 0.57 | 0.55 | 0.46 | 0.82 | 0.70 | 0.63 |
| ALS | 0.60 | 0.50 | 0.80 | 0.80 | 0.50 | 0.90 | 0.80 | 0.70 | 0.60 | 0.90 | 0.90 | 0.70 |
| MG | 0.15 | 0.22 | 0.30 | 0.60 | 0.28 | 0.57 | 0.33 | 0.41 | 0.44 | 0.62 | 0.45 | 0.56 |
| ALS | 0.20 | 0.30 | 0.40 | 0.40 | 0.50 | 0.60 | 0.60 | 0.70 | 0.80 | 0.80 | 0.90 | 0.90 |

**Supplementary Figure 7:** Scatter diagram of student enthusiasm about Electromagnetism group and Mechanics group


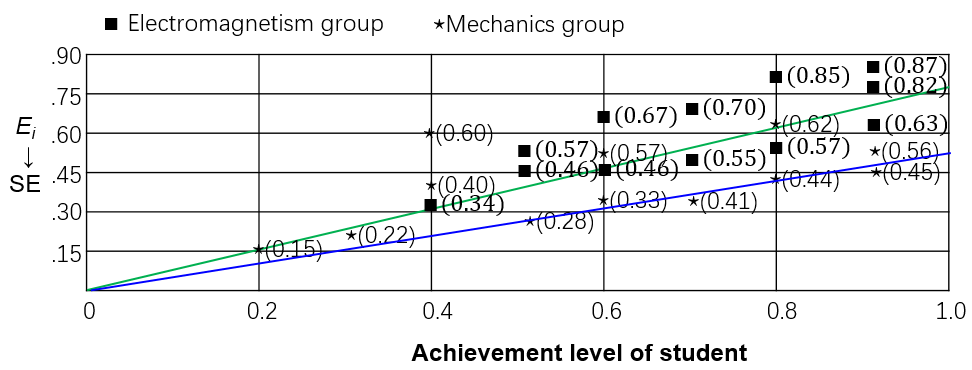


**Supplement 4:** **Results of RIEBP comprehension analysis**

**Supplementary Table 7.** Results of RIEBP comprehension analysis in STEM field.

|  | ***N*** | **Mean value** | **Standard deviation** | **CQV** | **Skewness** | **Kurtosis** |
| --- | --- | --- | --- | --- | --- | --- |
|  | 126 | 4.68 | 0.28 | 0.07 | -0.38 | -0.98 |
|  | 126 | 4.35 | 0.43 | 0.20 | -0.61 | -0.95 |
|  | 126 | 4.56 | 0.45 | 0.19 | -0.59 | -0.56 |
|  | 126 | 4.27 | 0.44 | 0.17 | -0.06 | -1.24 |
|  | 126 | 4.74 | 0.18 | 0.18 | -0.35 | -0.91 |
|  | 126 | 4.33 | 0.42 | 0.03 | -0.69 | 0.24 |
|  | 126 | 4.46 | 0.26 | 0.06 | -0.36 | -0.97 |
|  | 126 | 4.36 | 0.41 | 0.20 | -0.62 | -0.93 |
|  | 126 | 4.35 | 0.40 | 0.16 | -0.55 | -0.59 |
|  | 126 | 4.24 | 0.42 | 0.16 | -0.05 | -1.10 |
|  | 126 | 4.23 | 0.49 | 0.14 | -0.36 | 0.09 |
|  | 126 | 4.22 | 0.46 | 0.12 | -0.68 | 0.20 |

**Supplement 5: Results of RIEBP experimental report scores**

**
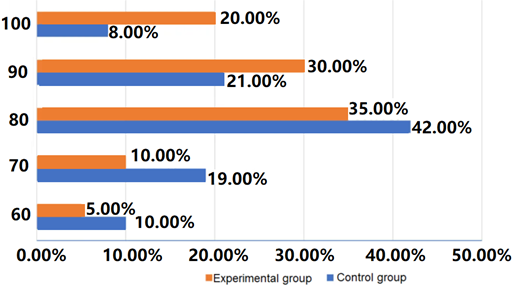
**

**Supplementary Figure 8.**  Distribution of experimental and control group experimental report scores (ERS)

**Supplementary Table 8.** The comparison of experimental and control group's experimental report scores pre-tests and post-tests

|  | | Experimental Group | | | | | | Control Group | | | | | |
| --- | --- | --- | --- | --- | --- | --- | --- | --- | --- | --- | --- | --- | --- |
| Tests | | N | M | SD | t | p | η2 | N | M | SD | t | p | d |
| 1 | Pretest | 63 | 11,87 | 5,30 | 11,42* | 0,00 | 2,02 | 63 | 11,18 | 4,53 | 3,90* | 0,00 | 0,69 |
| Posttest | 63 | 20,18 | 4,89 | 63 | 13,87 | 4,93 |
| 2 | Pretest | 63 | 4,13 | 0,93 | 2,15* | 0,039 | 0,48 | 63 | 4,34 | 0,92 | 1,66 | 0,107 | - |
| Posttest | 63 | 4,43 | 0,74 | 63 | 4,01 | 1,03 |
